# Supplementary material for: Age trajectories of disability in instrumental activities of daily living and disability-free life expectancy among middle-aged and older adults in Taiwan: an 11-year longitudinal study
Source: Springer Nature journal article supplement (doi:10.1186/s12877-020-01939-4), 2020-12-01
Supplement: MOESM1 [file 18670246]

**Supplementary Table S1. Baseline characteristics of the participants of the Taiwan Longitudinal Study in Aging (N=3,118)**

| <i>Variables</i>                      | N    | <i>Unweighted</i>    | <i>Weighted</i>      |
|---------------------------------------|------|----------------------|----------------------|
|                                       |      | %                    | %                    |
|                                       |      | <i>Mean ± (S.D.)</i> | <i>Mean ± (S.D.)</i> |
| <b>Age</b>                            | 3118 | 63.1(8.2)            | 60.7(7.9)            |
| <b>Female</b>                         | 1217 | 39.0                 | 41.2                 |
| <b>Education level</b>                |      |                      |                      |
| <b>Not formally educated</b>          | 873  | 28.0                 | 26.6                 |
| <b>Primary school</b>                 | 1364 | 43.8                 | 45.1                 |
| <b>Junior high school</b>             | 359  | 11.5                 | 11.4                 |
| <b>Senior high school and above</b>   | 522  | 16.7                 | 16.8                 |
| <b>Ethnic groups</b>                  |      |                      |                      |
| <b>Hoklo</b>                          | 2037 | 65.5                 | 68.6                 |
| <b>Hakka</b>                          | 531  | 17.1                 | 17.3                 |
| <b>Mainlander</b>                     | 500  | 16.1                 | 12.6                 |
| <b>Other</b>                          | 43   | 1.4                  | 1.5                  |
| <b>Place of Residence</b>             |      |                      |                      |
| <b>Urban</b>                          | 1221 | 39.6                 | 39.7                 |
| <b>Suburban</b>                       | 720  | 23.3                 | 23.2                 |
| <b>Rural/remote area</b>              | 1145 | 37.1                 | 37.1                 |
| <b>Married</b>                        | 2434 | 78.1                 | 80.7                 |
| <b>Not employed</b>                   | 1813 | 58.2                 | 52.5                 |
| <b>Unsatisfying economic status</b>   | 1808 | 59.8                 | 61.0                 |
| <b>Housing Tenure</b>                 |      |                      |                      |
| <b>Owner</b>                          | 1991 | 63.9                 | 67.2                 |
| <b>Owned by children</b>              | 664  | 21.3                 | 18.1                 |
| <b>Rented and others</b>              | 463  | 14.9                 | 14.7                 |
| <b>Smoking</b>                        | 971  | 31.1                 | 31.1                 |
| <b>Alcohol Drinking</b>               | 843  | 27.0                 | 27.5                 |
| <b>Chewing betel nut</b>              | 259  | 8.3                  | 9.3                  |
| <b>Leisure-time physical activity</b> |      |                      |                      |
| <b>None</b>                           | 1369 | 44.0                 | 47.5                 |
| ≤2 times/week, <30 mins/time          | 85   | 2.7                  | 3.0                  |
| ≤2 times/week, ≥30 mins/time          | 88   | 2.8                  | 3.2                  |
| ≥3 times/week, <30 mins/time          | 428  | 13.7                 | 12.8                 |
| ≥3 times/week, ≥30 mins/time          | 1145 | 36.8                 | 33.5                 |
| <b>Eating breakfast</b>               | 2919 | 93.9                 | 93.3                 |

|                                               |      |           |           |
|-----------------------------------------------|------|-----------|-----------|
| <b>Health check in the past three years</b>   | 1232 | 39.5      | 38.5      |
| <b>Self-rated health (excellent and good)</b> | 1447 | 47.7      | 48.2      |
| <b>Hospitalization in the past year</b>       | 338  | 10.8      | 10.4      |
| <b>Visual impairment</b>                      | 255  | 8.5       | 8.1       |
| <b>Hearing loss</b>                           | 125  | 4.2       | 3.6       |
| <b>Hypertension</b>                           | 660  | 21.2      | 19.9      |
| <b>Diabetes</b>                               | 244  | 7.8       | 7.5       |
| <b>Heart disease</b>                          | 291  | 9.3       | 8.1       |
| <b>Stroke</b>                                 | 37   | 1.2       | 1.1       |
| <b>Cancers</b>                                | 26   | 0.8       | 0.8       |
| <b>Bronchitis</b>                             | 217  | 7.0       | 6.4       |
| <b>Arthritis</b>                              | 405  | 13.0      | 12.6      |
| <b>Gastrointestinal disorders</b>             | 393  | 12.6      | 12.8      |
| <b>Liver or gall bladder diseases</b>         | 135  | 4.3       | 4.4       |
| <b>Cataract</b>                               | 373  | 12.0      | 9.8       |
| <b>Glaucoma</b>                               | 42   | 1.4       | 1.3       |
| <b>Kidney diseases</b>                        | 141  | 4.5       | 4.4       |
| <b>Gout</b>                                   | 196  | 6.3       | 6.1       |
| <b>Spin spur</b>                              | 178  | 5.7       | 5.7       |
| <b>Hip fractures</b>                          | 23   | 0.7       | 0.8       |
| <b>Other area fractures</b>                   | 56   | 1.8       | 1.7       |
| <b>Recall test<sup>§</sup></b>                | 3008 | 4.6 (2.3) | 4.7 (2.4) |
| <b>Backward digit test (no errors)</b>        | 2180 | 72.2      | 70.6      |
| <b>CES-D<sup>§</sup> scores</b>               | 3008 | 4.3 (4.9) | 4.3(5.1)  |
| <b>Living alone</b>                           | 242  | 7.8       | 6.7       |
| <b>Social participation</b>                   | 1490 | 48.5      | 46.9      |

---
